# Supplementary material for: Clinical Candidates Targeting the ATR–CHK1–WEE1 Axis in Cancer
Source: PubMed Central journal article supplement (PMC7918546; doi:10.3390/cancers13040795), 2021-02-14
Supplement: cancers-13-00795-s001.pdf [file cancers-13-00795-s001.pdf]

Supplementary Materials

## Clinical Candidates Targeting the ATR-CHK1-WEE1 Axis in Cancer

Lukas Gorecki, Martin Andrs and Jan Korabecny

**Table S1.** ATR, CHK1, and WEE1 inhibitors that have entered clinical trials, full version with detailed informations.

| Clinical Candidate<br>(Alternative Names and Structure) | Study Start            | Status                 | Phase                                    | Cancer Type                                                                                                            | Clinical Trial<br>Identification |
|---------------------------------------------------------|------------------------|------------------------|------------------------------------------|------------------------------------------------------------------------------------------------------------------------|----------------------------------|
| ATR                                                     | December, 2012         | completed              | I                                        | advanced solid tumor                                                                                                   | NCT02157792                      |
|                                                         | July, 2015             | recruiting             | I/II                                     | small cell cancers and extrapulmonary small cell cancers                                                               | NCT02487095                      |
|                                                         | September, 2016        | recruiting             | I                                        | HNSCC                                                                                                                  | NCT02567422                      |
|                                                         | August, 2016           | active, not recruiting | II                                       | metastatic urothelial cancer                                                                                           | NCT02567409                      |
|                                                         | July, 2016             | recruiting             | I                                        | treatment brain metastases from NSCLC, SCLC and neuroendocrine tumors                                                  | NCT02589522                      |
|                                                         | June, 2016             | recruiting             | I                                        | metastatic solid tumors or tumor that cannot be removed by surgery                                                     | NCT02595931                      |
|                                                         | August, 2016           | active, not recruiting | II                                       | recurrent ovarian, primary peritoneal, or fallopian tube cancer                                                        | NCT02595892                      |
|                                                         | November, 2016         | recruiting             | I                                        | recurrent and metastatic ovarian, primary peritoneal, or fallopian tube cancer                                         | NCT02627443                      |
|                                                         | January, 2018          | active, not recruiting | I                                        | advanced solid tumors                                                                                                  | NCT03309150                      |
|                                                         | October, 2018          | active, not recruiting | II                                       | metastatic castration-resistant prostate cancer                                                                        | NCT03517969                      |
|                                                         | December, 2018         | recruiting             | I                                        | oesophageal cancer                                                                                                     | NCT03641547                      |
|                                                         | June, 2020             | recruiting             | II                                       | progressive, metastatic, or unresectable <i>TP53</i> mutant gastric or gastroesophageal junction cancer                | NCT03641313                      |
|                                                         | March, 2019            | completed              | I                                        | PARPi-resistant ovarian cancer                                                                                         | NCT03704467                      |
|                                                         | January, 2019          | active, not recruiting | II                                       | leiomyosarcoma, osteosarcoma                                                                                           | NCT03718091                      |
|                                                         | August, 2019           | recruiting             | II                                       | SCLC and small cell cancers outside of the lungs                                                                       | NCT03896503                      |
|                                                         | November, 2019         | recruiting             | I                                        | chemotherapy-resistant triple-negative and estrogen and/or progesterone receptor positive, HER2 negative breast cancer | NCT04052555                      |
|                                                         | June, 2020             | suspended              | I / II                                   | NSCLC                                                                                                                  | NCT04216316                      |
|                                                         | March, 2020            | recruiting             | I / II                                   | DDR deficient metastatic or unresectable solid tumors                                                                  | NCT04266912                      |
|                                                         | November, 2013         | completed              | I                                        | lymphomas                                                                                                              | NCT01955668                      |
|                                                         | July, 2014             | active, not recruiting | I                                        | solid tumors refractory to conventional treatment                                                                      | NCT02223923                      |
| November, 2015                                          | active, not recruiting | II                     | solid tumors                             | NCT02576444                                                                                                            |                                  |
| December, 2015                                          | recruiting             | I                      | refractory cancer                        | NCT02630199                                                                                                            |                                  |
| May, 2015                                               | recruiting             | II                     | NSCLC                                    | NCT02664935                                                                                                            |                                  |
| November, 2016                                          | active, not recruiting | II                     | platinum refractory extensive stage SCLC | NCT02937818                                                                                                            |                                  |

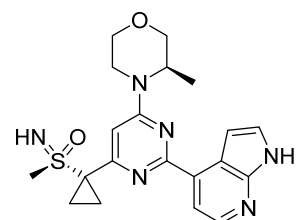**ceralasertib (AZD6738)**

|                 |                         |        |                                                       |             |
|-----------------|-------------------------|--------|-------------------------------------------------------|-------------|
| September, 2017 | recruiting              | I      | HNSCC                                                 | NCT03022409 |
| December, 2016  | recruiting              | II     | advanced breast cancer                                | NCT03182634 |
| January, 2018   | recruiting              | I / II | chronic lymphocytic leukemia                          | NCT03328273 |
| February, 2018  | active, not recruiting  | II     | metastatic TNBC                                       | NCT03330847 |
| December, 2017  | recruiting              | II     | NSCLC                                                 | NCT03334617 |
| October, 2018   | active, not recruiting  | II     | SCLC                                                  | NCT03428607 |
| March, 2018     | recruiting              | II     | recurrent ovarian cancer                              | NCT03462342 |
| June, 2018      | active, not recruiting  | I      | relapsed or refractory Non-Hodgkin's lymphoma         | NCT03527147 |
| October, 2019   | recruiting              | I      | advanced or metastatic solid tumors                   | NCT03669601 |
| January, 2019   | recruiting              | II     | advanced solid tumors excluding ovarian cancer        | NCT03682289 |
| October, 2019   | recruiting              | II     | chemotherapy resistant TNBC                           | NCT03740893 |
| August, 2019    | recruiting              | I      | leukemia and myelodysplastic syndrome                 | NCT03770429 |
| July, 2019      | active, not recruiting  | II     | refractory gastric cancer and metastatic melanoma     | NCT03780608 |
| October, 2019   | recruiting              | II     | resistant prostate cancer                             | NCT03787680 |
| October, 2019   | recruiting              | II     | advanced NSCLC                                        | NCT03833440 |
| December, 2019  | recruiting              | II     | malignant solid tumors                                | NCT03878095 |
| November, 2019  | recruiting              | II     | gynaecological cancers                                | NCT04065269 |
| July, 2020      | recruiting              | II     | advanced or metastatic BRCA mutated breast cancer     | NCT04090567 |
| August, 2020    | recruiting              | II     | ovarian cancer                                        | NCT04239014 |
| June, 2020      | recruiting              | II     | advanced biliary tract cancer                         | NCT04298021 |
| June, 2020      | recruiting              | II     | advanced biliary tract cancer                         | NCT04298008 |
| June, 2020      | enrolling by invitation | II     | relapsed SCLC                                         | NCT04361825 |
| November, 2020  | recruiting              | II     | recurrent osteosarcoma                                | NCT04417062 |
| December, 2020  | recruiting              | II     | advanced solid tumors                                 | NCT04564027 |
| February, 2021  | not yet recruiting      | II     | extensive stage SCLC                                  | NCT04699838 |
| February, 2021  | not yet recruiting      | I      | advanced solid tumors expressing HER2 protein or gene | NCT04704661 |

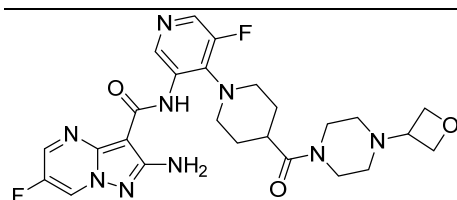**M4344 (VX-803)**

|                 |                    |        |                                                                                           |             |
|-----------------|--------------------|--------|-------------------------------------------------------------------------------------------|-------------|
| January, 2015   | recruiting         | I      | advanced solid tumors                                                                     | NCT02278250 |
| December, 2020  | not yet recruiting | I      | PARPi-resistant recurrent ovarian cancer                                                  | NCT04149145 |
| December, 2020  | not yet recruiting | I / II | advanced breast cancer                                                                    | NCT04655183 |
| July, 2017      | recruiting         | I      | advanced solid tumors, and lymphomas                                                      | NCT03188965 |
| September, 2019 | recruiting         | I      | advanced solid tumors                                                                     | NCT04095273 |
| February, 2020  | recruiting         | I      | advanced solid tumors, and ovarian cancer                                                 | NCT04267939 |
| February, 2021  | not yet recruiting | I      | advanced solid tumors with emphasis on urothelial cancer                                  | NCT04491942 |
| February, 2021  | not yet recruiting | I      | advanced solid tumors with emphasis on SCLC, neuroendocrine cancer, and pancreatic cancer | NCT04514497 |
| March, 2021     | not yet recruiting | I      | advanced or metastatic cancers of the stomach and intestines                              | NCT04535401 |

|  |                                                                                   |                 |                        |        |                                                                                                                                                                          |             |
|--|-----------------------------------------------------------------------------------|-----------------|------------------------|--------|--------------------------------------------------------------------------------------------------------------------------------------------------------------------------|-------------|
|  | 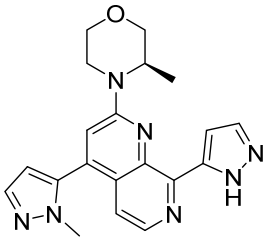 | February, 2021  | not yet recruiting     | I      | Recurrent HNSCC                                                                                                                                                          | NCT04576091 |
|  |                                                                                   | February, 2021  | not yet recruiting     | I      | advanced solid tumors, pancreatic cancer, and ovarian cancer                                                                                                             | NCT04616534 |
|  | <b>BAY1895344</b>                                                                 | February, 2010  | completed              | I      | advanced and/or metastatic solid tumors                                                                                                                                  | NCT01115790 |
|  |                                                                                   | June, 2014      | completed              | I      | advanced and/or metastatic solid tumors                                                                                                                                  | NCT02124148 |
|  |                                                                                   | January, 2015   | active, not recruiting | II     | BRCA1/2 mutation associated breast or ovarian cancer, triple negative breast cancer, high grade serous ovarian cancer, and metastatic castrate-resistant prostate cancer | NCT02203513 |
|  |                                                                                   | October, 2015   | completed              | I      | advanced and/or metastatic solid tumors                                                                                                                                  | NCT02514603 |
|  |                                                                                   | February, 2016  | completed              | I      | advanced HNSCC                                                                                                                                                           | NCT02555644 |
|  |                                                                                   | May, 2016       | active, not recruiting | I      | relapsed or refractory acute myeloid leukemia or myelodysplastic syndrome                                                                                                | NCT02649764 |
|  |                                                                                   | May, 2016       | completed              | II     | extensive stage SCLC                                                                                                                                                     | NCT02735980 |
|  |                                                                                   | September, 2016 | completed              | I      | advanced and/or metastatic solid tumors                                                                                                                                  | NCT02778126 |
|  |                                                                                   | February, 2017  | active, not recruiting | I      | recurrent or refractory solid tumors in pediatric patients                                                                                                               | NCT02808650 |
|  |                                                                                   | August, 2016    | completed              | I      | advanced and/or metastatic solid tumors                                                                                                                                  | NCT02860780 |
|  |                                                                                   | October, 2016   | active, not recruiting | II     | advanced and/or metastatic solid tumors with RS or HR deficiency                                                                                                         | NCT02873975 |
|  |                                                                                   | March, 2017     | active, not recruiting | I      | advanced and/or metastatic solid tumors                                                                                                                                  | NCT03057145 |
|  |                                                                                   | April, 2018     | active, not recruiting | II     | platinum-resistant or refractory recurrent ovarian cancer                                                                                                                | NCT03414047 |
|  |                                                                                   | May, 2018       | active, not recruiting | I      | advanced and/or metastatic solid tumors                                                                                                                                  | NCT03495323 |
|  |                                                                                   | January, 2019   | terminated             | I      | relapsed or refractory acute myeloid leukemia or myelodysplastic syndrome                                                                                                | NCT03735446 |
|  |                                                                                   | August, 2019    | recruiting             | I      | recurrent refractory or progressive medulloblastoma in pediatric patients                                                                                                | NCT04023669 |
|  |                                                                                   | September, 2019 | recruiting             | II     | metastatic TNBC                                                                                                                                                          | NCT04032080 |
|  |                                                                                   | September 2019  | recruiting             | I / II | desmoplastic small round cell tumor and rhabdomyosarcoma                                                                                                                 | NCT04095221 |
|  |  | January, 2007   | completed              | I      | solid tumors                                                                                                                                                             | NCT00415636 |
|  |                                                                                   | February, 2009  | completed              | I / II | pancreatic cancer                                                                                                                                                        | NCT00839332 |
|  |                                                                                   | November, 2009  | completed              | II     | advanced or metastatic NSCLC                                                                                                                                             | NCT00988858 |
|  |                                                                                   | February, 2011  | completed              | I / II | NSCLC                                                                                                                                                                    | NCT01139775 |
|  |                                                                                   | February, 2011  | completed              | I      | advanced and/or metastatic solid tumors                                                                                                                                  | NCT01296568 |
|  |                                                                                   | May, 2011       | completed              | I      | advanced and/or metastatic solid tumors                                                                                                                                  | NCT01341457 |
|  |                                                                                   | May, 2011       | completed              | I      | advanced and/or metastatic solid tumors                                                                                                                                  | NCT01358968 |
|  | <b>rabusertib (LY2603618)</b>                                                     |                 |                        |        |                                                                                                                                                                          |             |

|                                                                                     |                            |                        |                                           |                                                 |                                                             |             |
|-------------------------------------------------------------------------------------|----------------------------|------------------------|-------------------------------------------|-------------------------------------------------|-------------------------------------------------------------|-------------|
| 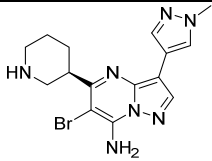   | October, 2008              | completed              | I                                         | advanced solid tumors or lymphoma               | NCT00779584                                                 |             |
|                                                                                     | July, 2009                 | terminated             | I                                         |                                                 | acute leukemias                                             | NCT00907517 |
|                                                                                     | March, 2012                | withdrawn              | I                                         |                                                 | advanced solid tumors                                       | NCT01521299 |
|                                                                                     | May, 2013                  | completed              | II                                        | relapsed acute myeloid leukemia                 | NCT01870596                                                 |             |
|                                                                                     | <b>MK-8776 (SCH099776)</b> |                        |                                           |                                                 |                                                             |             |
|    | July, 2016                 | completed              | I / II                                    | advanced solid tumors or Non-Hodgkin's lymphoma | NCT02797977                                                 |             |
|                                                                                     | July, 2016                 | completed              | I / II                                    |                                                 | NCT02797964                                                 |             |
| <b>SRA737</b>                                                                       |                            |                        |                                           |                                                 |                                                             |             |
|    | March, 2012                | completed              | I                                         | refractory solid tumors or lymphoma             | NCT01564251                                                 |             |
|                                                                                     | <b>GDC-0575 (ARRY-575)</b> |                        |                                           |                                                 |                                                             |             |
|   | December, 2006             | terminated             | I                                         | advanced solid tumors                           | NCT00437203                                                 |             |
|                                                                                     | <b>PF-00477736</b>         |                        |                                           |                                                 |                                                             |             |
|  | December, 2006             | completed              | I                                         | advanced solid tumors                           | NCT00413686                                                 |             |
|                                                                                     | May, 2007                  | terminated             | I                                         |                                                 | NCT00473616                                                 |             |
|                                                                                     | July, 2009                 | terminated             | I                                         |                                                 | NCT00937664                                                 |             |
| <b>AZD7762</b>                                                                      |                            |                        |                                           |                                                 |                                                             |             |
| <b>WEE1</b>                                                                         | February, 2008             | completed              | I                                         | advanced solid tumors                           | NCT00648648                                                 |             |
|                                                                                     | January, 2010              | terminated             | I                                         |                                                 | NCT01047007                                                 |             |
|                                                                                     | May, 2010                  | terminated             | I / II                                    |                                                 | cervical cancer                                             | NCT01076400 |
|                                                                                     | July, 2010                 | unknown                | II                                        |                                                 | <i>TP53</i> mutated refractory and resistant ovarian cancer | NCT01164995 |
|                                                                                     | July, 2011                 | completed              | II                                        |                                                 | <i>TP53</i> mutated platinum-sensitive ovarian tumors       | NCT01357161 |
|                                                                                     | December, 2012             | completed              | I                                         |                                                 | refractory solid tumors                                     | NCT01748825 |
|                                                                                     | December, 2013             | active, not recruiting | II                                        |                                                 | advanced solid tumors                                       | NCT01827384 |
| August, 2013                                                                        | active, not recruiting     | I                      | newly diagnosed or recurrent glioblastoma | NCT01849146                                     |                                                             |             |

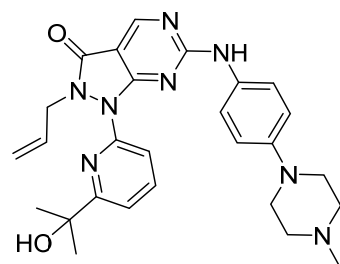

**adavosertib**  
**(AZD1775/MK-1775)**

|                 |                        |         |                                                                                              |             |
|-----------------|------------------------|---------|----------------------------------------------------------------------------------------------|-------------|
| September, 2013 | active, not recruiting | I       | newly diagnosed diffuse intrinsic pontine gliomas                                            | NCT01922076 |
| January, 2014   | completed              | I / II  | unresectable adenocarcinoma of the pancreas                                                  | NCT02037230 |
| March, 2014     | terminated             | II      | untreated advanced NSCLC                                                                     | NCT02087241 |
| March, 2014     | terminated             | II      | previously treated NSCLC                                                                     | NCT02087176 |
| March, 2014     | active, not recruiting | I / II  | relapsed or refractory solid tumors in pediatric patients                                    | NCT02095132 |
| July, 2014      | active, not recruiting | II      | recurrent ovarian, primary peritoneal, or fallopian tube cancer                              | NCT02101775 |
| July, 2014      | active, not recruiting | I / II  | previously untreated pancreatic cancer that is metastatic or cannot be removed by surgery    | NCT02194829 |
| March, 2014     | terminated             | II      | recurrent or metastatic HNSCC                                                                | NCT02196168 |
| July, 2014      | completed              | 0       | glioblastoma                                                                                 | NCT02207010 |
| January, 2015   | active, not recruiting | II      | platinum-resistant epithelial ovarian, fallopian tube, or primary peritoneal cancer          | NCT02272790 |
| January, 2015   | completed              | I       | advanced solid tumors                                                                        | NCT02341456 |
| August, 2015    | terminated             | I       | relapsed or refractory myeloid malignancies or untreated acute myeloid leukemia              | NCT02381548 |
| January, 2015   | recruiting             | II      | advanced gastric adenocarcinoma harboring <i>TP53</i> Mutation                               | NCT02448329 |
| August, 2015    | recruiting             | II      | advanced refractory solid tumors, lymphomas, or multiple myeloma                             | NCT02465060 |
| July, 2015      | completed              | I       | advanced solid tumors                                                                        | NCT02482311 |
| July, 2015      | completed              | I       | HNSCC                                                                                        | NCT02508246 |
| August, 2015    | completed              | I       | refractory solid tumors                                                                      | NCT02511795 |
| October, 2015   | recruiting             | II      | squamous cell lung cancer                                                                    | NCT02513563 |
| October, 2016   | active, not recruiting | I       | muscle invasive bladder cancer                                                               | NCT0254661  |
| November, 2015  | active, not recruiting | II      | metastatic solid tumors                                                                      | NCT02576444 |
| February, 2016  | completed              | I       | HNSCC                                                                                        | NCT02585973 |
| December, 2015  | unknown                | II      | Relapsed SCLC                                                                                | NCT02593019 |
| December, 2015  | completed              | I       | advanced or metastatic solid tumors                                                          | NCT02610075 |
| December, 2015  | active, not recruiting | I       | advanced solid tumors                                                                        | NCT02617277 |
| February, 2016  | recruiting             | early I | advanced high grade ovarian, fallopian tube, or primary peritoneal cancer                    | NCT02659241 |
| May, 2017       | completed              | II      | advanced acute myeloid leukemia or myelodysplastic syndrome                                  | NCT02666950 |
| June, 2016      | terminated             | II      | relapsed SCLC with <i>MYC</i> amplification, <i>CDKN2A</i> mutation and <i>TP53</i> mutation | NCT02688907 |
| May, 2017       | withdrawn              | I       | relapsed or refractory acute myeloid leukemia in pediatric patients                          | NCT02791919 |
| August, 2016    | recruiting             | I / II  | hematologic or solid malignancies in pediatric patients                                      | NCT02813135 |
| September, 2016 | completed              | I       | metastatic colorectal cancer                                                                 | NCT02906059 |
| November, 2016  | active, not recruiting | II      | platinum-refractory extensive-stage SCLC                                                     | NCT02937818 |
| January, 2017   | active, not recruiting | II      | metastatic TNBC                                                                              | NCT03012477 |
| June, 2017      | active, not recruiting | I       | HNSCC                                                                                        | NCT03028766 |
| September, 2018 | suspended              | II      | advanced refractory solid tumors with <i>CCNE1</i> amplification                             | NCT03253679 |
| May, 2018       | recruiting             | II      | advanced solid tumors with loss of <i>SETD2</i>                                              | NCT03284385 |
| October, 2017   | completed              | I       | advanced solid tumors                                                                        | NCT03313557 |

---

|                 |                        |    |                                                                                                |             |
|-----------------|------------------------|----|------------------------------------------------------------------------------------------------|-------------|
| September, 2017 | completed              | I  | advanced solid tumors                                                                          | NCT03315091 |
| February, 2018  | active, not recruiting | II | metastatic TNBC                                                                                | NCT03330847 |
| December, 2017  | completed              | I  | advanced solid tumors                                                                          | NCT03333824 |
| October, 2017   | active, not recruiting | I  | cervical, upper vaginal and uterine cancers                                                    | NCT03345784 |
| December, 2018  | recruiting             | II | recurrent ovarian, primary peritoneal, or fallopian tube cancer                                | NCT03579316 |
| October, 2018   | recruiting             | II | recurrent or persistent uterine cancer                                                         | NCT03668340 |
| May, 2019       | terminated             | II | advanced AML, myelodysplastic syndrome and myelofibrosis                                       | NCT03718143 |
| April, 2020     | recruiting             | I  | advanced solid tumors with PARPi resistance                                                    | NCT04197713 |
| March, 2017     | active, not recruiting | II | advanced refractory solid tumors, lymphomas, and multiple myelomas, with <i>BRCA</i> mutations | NCT04439227 |
| June, 2020      | recruiting             | I  | advanced solid tumors                                                                          | NCT04462952 |
| October, 2020   | recruiting             | I  | incurable esophageal and gastroesophageal junction cancers                                     | NCT04460937 |
| November, 2020  | recruiting             | II | uterine serous carcinoma                                                                       | NCT04590248 |

---

Aligned according to NCT numbers from the lowest to highest. AML – acute myeloid leukemia; HNSCC – head and neck squamous cell carcinoma; HR – homologous recombination; NSCL – non-small cell lung carcinoma; RS – replication stress; SCLC – small cell lung carcinoma; TNBC – triple negative breast cancer
